# Supplementary material for: Discovery and Development of Safe-in-Man Broad-Spectrum Antiviral Agents
Source: Preprints.org preprint supplement (doi:10.20944/preprints201910.0144.v1), 2019-10-13
Supplement: Supplementary file 1 [file supplementary]

## Sheet: Sheet1
Drug	Primary indication	Virus	Status as antiviral								Potential target	Reference	Other activities
			Cell cultures/co-cultures	Primary cells/ESCs/iPSCs	Animal model	Phase I	Phase II	Phase III	Approved	Phase IV		Antiviral	Antibacterial	Antifungal	Antiprotozoal	Antihelmintic
4-HPR (Fenretinide)	Approved anticancer	DENV	*		*						Viral RNA pol	PMID:24903662
		WNV	*								Viral RNA pol	PMID:25313218,
		HCV	*								Viral RNA pol	PMID:25313218
		ZIKV	*								Viral RNA pol	PMID:29051080
		RSV	*								Viral RNA pol	PMID:26307636
		HIV-1	*								Viral RT	PMID:16375981
Abamectin	Approved antihelmintic	CHIKV	*								Unknown	PMID:26752081				CID: 6434889
		SINV	*								Unknown	PMID:26752081
		YFV	*								Unknown	PMID:26752081
ABT-263	Investigational anticancer	FLUAV	*		*						Human BCL2	PMID:23887633
		FLUBV	*								Human BCL2	PMID:23887633
		BUNV	*								Human BCL2	PMID:23887633
		HSV-1	*								Human BCL2	PMID:23887633
		HSV-2	*								Human BCL2	PMID:23887633
		HEV-B	*								Human BCL2	PMID:23887633
		SINV	*								Human BCL2	PMID:23887633
		MeV	*								Human BCL2	PMID:23887633
		ZIKV	*								Human BCL2	PMID:28946654
		HBV	*								Human BCL2	PMID:28946654
		MERS-CoV	*								Human BCL2	PMID:28946654
		HIV-1	*								Human BCL2	N.A.
Acetylsalicylic acid	Approved anti-inflammatory	HCV	*								Human PTGS1	PMID:26289738	PMID: 19302313	PMID17094014,PMID27246782
		HSV-1	*		*	*					Human PTGS1	PMID:24768597, NCT00587496
		ZIKV	*								Human PTGS1	PMID:30068645
		FLUAV	*								Human PTGS1	PMID:17324159
Aciclovir	Approved antiviral	HSV-1					*		*	*	Viral DNA pol	CID: 23709358, NCT01026454, DB00787
		HSV-2					*	*	*		Viral DNA pol	CID: 23709358, NCT00723229, DB00787
		VZV					*	*	*		Viral DNA pol	CID: 23709358, NCT00209352, DB00787
		EBV	*								Viral DNA pol	PMID:29899236
Alisporivir	Investigational antiviral	HCV				*	*	*			Human CYPA	NCT02753699
		SARS-CoV	*								Human CYPA	PMID:30014857
		MERS-CoV	*								Human CYPA	PMID:27840112
		HIV-1	*								Human CYPA	PMID:19857522
Amodiaquine	Approved antimalarial	DENV	*								Unknown	PMID:24680954
		WNV	*								Unknown	PMID:24680954
		EBOV	*								Unknown	PMID:30395872
		ZIKV	*	*							Unknown	PMID:28736217
		SINV	*								Unknown	PMID:30791609
		LASV	*								Unknown	PMID:30700611
		HCV	*								Unknown	PMID:30791609
		VSV	*								Unknown	PMID:30791609
		RABV	*								Unknown	PMID:30791609
		HSV-1	*								Unknown	PMID:30791609
		YFV	*								Unknown	PMID:30791609
		RRV	*								Unknown	PMID:30791609
Aprotinin	Approved antifibrinilytic	FLUAV	*								Multiple	PMID:21602614	PMID: 29298032			PMID: 9425816
		FLUBV	*								Multiple	PMID:7515225
		DENV	*								Multiple	PMID:1707950
		WNV	*								Multiple	PMID:17188926
		RV	*		*						Multiple	PMID:1723785
		SINV	*		*						Multiple	PMID:2429615
Arbidol (Umifenovir)	Approved antiviral	FLUAV						*	*	*	Multiple	CID:131411, NCT01651663
		LASV	*								Multiple	PMID:30700611
		EBOV	*								Multiple	PMID:30700611
		HSV-2	*		*						Multiple	PMID:30612085
		ZIKV	*								Multiple	PMID:29895962
		TBEV	*								Multiple	PMID:29642580
		WNV	*								Multiple	PMID:29642580
		HSV-1	*								Multiple	PMID:28890393
Artesunate	Approved antimalarial	CMV						*			Unknown	NCT00284687		PMID: 24316259	PMID: 24316259	PMID: 24316259
		EBOV					*	*			Unknown	NCT02307591
		EBV	*								Unknown	PMID:30677427
		HHV-6	*								Unknown	PMID:30677427
		BKV	*								Unknown	PMID:30677427
		HPV				*	*				Unknown	NCT03100045, NCT04098744
		JCV	*								Unknown	PMID:30677427
Azacitidine	Approved anticancer	ADV	*								Viral DNA pol	PMID:11562975
		FLUAV	*								Viral RNA pol	PMID:11562975
		HMPV	*								Viral RNA pol	doi: 10.3389/fimmu.2019.02186
		RVFV	*								Viral RNA pol	PMID:29698664
		HIV-1	*								Viral RT	PMID:27117260
		HIV-2	*								Viral RT	PMID:25103850
Azithromycin	Approved antibacterial	RSV				*	*	*			Unknown	NCT02911935, NCT02911935	DB00207	PMID: 25001300	PMID: 27215296
		FLUAV								*	Unknown	NCT01779570
		EBOV	*		*	*	*				Unknown	PMID:27622822, NCT02380625
		HRV-A	*		*						Unknown	PMID:28415826
		HIV-1				N.A.					Unknown	NCT04036318, NCT01227395
		HCV	*								Unknown	doi: 10.3389/fimmu.2019.02186
		ZIKV	*								Unknown	PMID:27911847
		HEV-A	*		*						Unknown	PMID:30599241
		HEV-B	*		*						Unknown	PMID:30599241
BCX4430 (Galdecivir)	Approved antiviral	HCV									Viral RNA pol	CID:69211190
		EBOV				*					Viral RNA pol	NCT02319772
		MARV				*					Viral RNA pol	NCT03800173
		RAVV	*								Viral RNA pol	PMID:24590073
		TBEV	*								Viral RNA pol	PMID:28336346
		WNV	*								Viral RNA pol	PMID:28336346
		YFV	*			*					Viral RNA pol	PMID:25155605, NCT03891420
		RVFV	*								Viral RNA pol	PMID:29864447
		DENV	*								Viral RNA pol	PMID:28473729
		JEV	*								Viral RNA pol	PMID:28473729
		ZIKV	*		*						Viral RNA pol	PMID:27838352
Berberine	Investigational anticancer	CHIKV	*								Unknown	PMID:26752081	PMID: 26191220	PMID: 27021328	PMID: 25663104
		SINV	*								Unknown	PMID:26752081
		CMV	*								Unknown	PMID:30738836
		HCV	*								Unknown	PMID:30668413
		ZIKV	*								Unknown	PMID:30641880
		HEV-B	*								Unknown	PMID:28341822
		HEV-A	*								Unknown	PMID:28081706
		RSV	*								Unknown	PMID:25939536
		HSV-1	*								Unknown	PMID:24913175
		FLUAV	*								Unknown	PMID:21683808
		HPV	*								Unknown	PMID:21496227
		HIV-1	*								Unknown	PMID:21295891
Bortezomib	Approved anticancer	DENV	*		*						Human PSMB5	PMID:26565697	PMID: 25944857
		HBV	*		*						Human PSMB5	PMID:19949053
		FLUAV	*								Human PSMB5	PMID:20592098
		RSV	*		*						Human PSMB5	PMID:19931343
		RVFV	*								Human PSMB5	PMID:26001632
		VSV	*								Human PSMB5	PMID:20592098
		ZIKV	*								Human PSMB5	PMID:27476412
Brequinar	Investigational anticancer	DENV	*								Human DHODH	NCT03760666
		WNV	*								Human DHODH	PMID:20606073
		YFV	*								Human DHODH	PMID:20606073
		LASV	*								Human DHODH	PMID:31302150
		JUNV	*								Human DHODH	PMID:31302150
		LCMV	*								Human DHODH	PMID:31302150
		VSV	*								Human DHODH	PMID:20606073
		HIV-1	*								Human DHODH	doi: 10.20944/preprints201909.0128.v1
		RV		*							Human DHODH	PMID:30974126
		POWV	*								Human DHODH	PMID:20606073
Brincidofovir	Investigational antiviral	ADV					*	*			Viral DNA pol	NCT02087306, NCT01143181
		BKV				*	*	*			Viral DNA pol	NCT01769170
		CMV					*	*			Viral DNA pol	NCT01769170, NCT01143181
		EBV						*			Viral DNA pol	NCT01769170
		HHV-6						*			Viral DNA pol	NCT01769170
		EBOV					*				Viral RNA pol	PACTR201411000939962, NCT02271347
		HSV-1	*			*	*	*			Viral DNA pol	PMID:30120866, NCT01610765, NCT01143181
		B19V	*								Viral DNA pol	PMID:30529090
		VACV	*				*	*			Viral DNA pol	PMID:30677427, NCT01143181
		JCV	*								Viral DNA pol	PMID:30677427
		VARV	*				*	*			Viral DNA pol	PMID:30677427, NCT01143181
		KSHV	*								Viral DNA pol	PMID:30677427
		VZV	*								Viral DNA pol	PMID:30120866
Bromocriptine	Approved anticancer	DENV	*								Viral protease	PMID:27181378
		TBEV	*								Viral protease	PMID:27181378
		ZIKV	*								Viral protease	PMID:28185815
Caffeine	Approved anti-bronchopulmonary dysplasia	HCV	*			*					Viral RNA pol	PMID:25491197, NCT01525628			PMID: 28320723
		FLUAV	*								Viral RNA pol	PMID:25050906
		JUNV	*								Viral RNA pol	PMID:10509392
		HSV-1	*								Viral DNA pol	PMID:21725588
		VZV	*								Viral DNA pol	PMID:6257827
Camostat	Approved anticancer	MERS-CoV	*								Human PRSS1	PMID:25666761
		SARS-CoV	*								Human PRSS1	PMID:25666761
		FLUAV	*								Human PRSS1	PMID:21802447
		FLUBV	*								Human PRSS1	PMID:1510439
Chloroquine	Approved antimalarial	FLUAV					*				Unknown	NCT01078779	PMID: 29298032	PMID: 24123346	CID:2719
		CHIKV	*					*			Unknown	PMID:29772762, NCT00391313
		HCV								*	Unknown	NCT02058173
		RAVBV								*	Unknown	NCT02564471
		DENV	*			*	*				Unknown	PMID:25664975, NCT00849602
		HIV-1					*	*			Unknown	NCT00308620
		EBOV	*		*						Unknown	PMID:27622822
		HCoV-OC43	*								Unknown	PMID:27381385
		KSHV	*								Unknown	PMID:27521848
		SARS-CoV	*								Unknown	PMID:14592603
		HEV-A	*		*						Unknown	PMID:29175128
		ZIKV	*								Unknown	PMID:27916837
Cidofovir	Approved antiviral	CMV					*	*	*	*	Viral DNA pol	CID:60613, NCT01866397, DB00369
		BKV				*	*				Viral DNA pol	NCT00138424
		HPV					*				Viral DNA pol	NCT00550589
		HSV-1				*	*				Viral DNA pol	NCT00002116, NCT01610765
		HSV-2				*	*				Viral DNA pol	NCT00002116, NCT01610765
		B19V	*								Viral DNA pol	PMID:25446336
		VZV	*								Viral DNA pol	PMID:30287226
		ADV	*								Viral DNA pol	PMID:30287226
		EBV	*								Viral DNA pol	PMID:30287227
		JCV	*								Viral DNA pol	PMID:30287227
		KSHV	*								Viral DNA pol	PMID:30287227
		HHV-6	*								Viral DNA pol	PMID:30287227
		MCV	*								Viral DNA pol	PMID:21994641
		HCV	*								Unknown	doi: 10.3389/fimmu.2019.02186
Cyclosporine	Approved immunosuppressant	HCV	*				*	*		*	Human CYPA	PMID:16382464, NCT00821587
		FLUAV	*								Human CYPA	PMID:16382464
		ZIKV	*								Human CYPA	PMID:27476412
		RVFV	*								Human CYPA	PMID:29698664
		VSV	*								Human CYPA	PMID:12810862
		VACV	*								Human CYPA	PMID:9472618
		CMV	*							*	Human CYPA	PMID:22238232, NCT02328963
		HIV-1	*				*			*	Human CYPA	PMID:22174692, NCT03360682
		YFV	*								Human CYPA	PMID:19451286
		DENV	*								Human CYPA	PMID:19451286
		WNV	*								Human CYPA	PMID:19451286
CYT107	Investigational antiviral	HBV				*	*				Human CD127	NCT01027065
		HCV				*	*				Human CD127	NCT01025596
		HIV-1					*				Human CD127	NCT01019551
Dalbavancin	Approved antibacterial	EBOV	*								Human CTSL	PMID:26953343	DB06219
		MERS-CoV	*								Human CTSL	PMID:26953343
		SARS-CoV	*								Human CTSL	PMID:26953343
		HEV-B	*								Human CTSL	PMID:29698664
		ZIKV	*								Human CTSL	PMID:27476412
Dasatinib	Approved anticancer	BKV	*								Human RTKs	PMID:21088155
		DENV	*								Human RTKs	PMID:23616652
		HCV	*								Human RTKs	PMID:28674529
		HEV-B	*								Human RTKs	PMID:29698664
		HIV-1	*								Human RTKs	PMID:26851491
Dibucaine	Approved anesthetic	HEV-A	*								Viral helicase	PMID:26856848	PMID: 28052847
		HEV-B	*								Viral helicase	PMID:26856848
		HCV	*								Viral helicase	doi: 10.3389/fimmu.2019.02186
		HEV-D	*								Viral helicase	PMID:26856848
Diphyllin	Investigational anticancer	FLUAV	*		*						Human vATPase	PMID:30587980			PMID: 15856417
		EBOV	*								Human vATPase	PMID:30335906
		HIV-1	*								Human vATPase	PMID:29328465
Doxycycline	Approved antibacterial	CHIKV	*		*						Human PADI4	PMID:25970853	DB00254		PMID: 26555664	PMID: 25537873
		DENV	*								Human PADI4	PMID:2414227
		VSV	*								Human PADI4	PMID:26459887
EIPA (amiloride)	Approved anti-arrhythmic	EBOV	*								Human SLC9A1	PMID:27161622
		MARV	*								Human SLC9A1	PMID:27161622
		LASV	*								Human SLC9A1	PMID:24173224
		JUNV	*								Human SLC9A1	PMID:24173224
		MeV	*								Human SLC9A1	PMID:28250131
		HRV-A	*								Human SLC9A1	PMID:23913188
		HSV-1	*								Human SLC9A1	PMID:25210183
		KSHV	*								Human SLC9A1	PMID:19279100
		HEV-B	*								Viral RNA pol	PMID:21795353
		HEV-A	*								Viral RNA pol	PMID:31326561
		CHIKV	*								Human SLC9A1	PMID: 31449523
		HEV-C	*								Viral RNA pol	PMID:25058507
		HRV-B	*								Human SLC9A1	PMID:16054245
Eflornithine	Approved antiprotozoal, withdrawn	CHIKV	*								Human ODC1	PMID:27535047			DB06243
		HEV-B	*								Human ODC1	PMID:27535047
		DENV	*								Human ODC2	PMID:27535048
		JEV	*								Human ODC3	PMID:27535049
		MERS-CoV	*								Human ODC4	PMID:27535050
		HSV-1	*								Human ODC1	PMID:12569563
		CMV	*								Human ODC1	PMID:6283366
		VSV	*								Human ODC1	PMID:27535047
		ZIKV	*								Human ODC1	PMID:27535047
		SINV	*								Human ODC1	PMID:27535047
Emetine	Approved antiprotozoal	ZIKV	*								Human ribosome	PMID:29872540	PMID: 595108		CID: 10219
		EBOV	*								Human ribosome	PMID:29872540
		FLUAV	*								Human ribosome	doi: 10.20944/preprints201909.0128.v1
		RABV	*								Human ribosome	PMID:30028873
		CMV	*		*						Human ribosome	PMID:27336364
		HCoV-OC43	*								Human ribosome	PMID:30918074
		RVFV	*								Human ribosome	doi: 10.20944/preprints201909.0128.v1
		HMPV	*								Human ribosome	doi: 10.20944/preprints201909.0128.v1
		HSV-2	*								Human ribosome	doi: 10.20944/preprints201909.0128.v1
		HEV-B	*								Human ribosome	doi: 10.20944/preprints201909.0128.v1
		HIV-1	*								Human ribosome	PMID:26111177
Emodin	Investigational anticancer	ZIKV	*								Multiple	PMID:30641880	PMID: 27242151	PMID: 28181315
		FLUAV	*		*						Multiple	PMID:29057806
		HEV-A	*								Multiple	PMID:27840410
		HEV-B	*		*						Multiple	PMID:26621875
		EBV	*								Multiple	PMID:24448066
		CMV	*								Multiple	PMID:25499125
		SARS-CoV	*								Multiple	PMID:16730806
		HBV	*		*						Multiple	PMID:19960563
		HSV-1	*								Multiple	PMID:18552872
Erlotinib	Approved anticancer	BKV	*								Human RTKs	PMID:21088155
		EBOV	*			*	*				Human RTKs	PMID:28240606, NCT02380625
		DENV	*		*						Human RTKs	PMID:29753658
		HCV	*			*	*				Human RTKs	PMID:28240606, NCT01835938
Esomeprazole	Approved anti-gastroesophageal reflux disease	EBOV	*								Human ATP4A	PMID:26069727	PMID: 12562719
		FLUAV	*								Human ATP4A	PMID:26069727
		MARV	*								Human ATP4A	PMID:26069727
Ezetimibe	Approved lipid-lowering	HCV						*		*	Human NTCP	NCT02971033, NCT02768545			PMID: 27600041
		HDV					*				Human NTCP	NCT03099278, NCT03099278
		HBV	*								Human NTCP	PMID:25034482
		HIV-1	*			N.A.					Human NTCP	NCT00099684
		RVFV	*								Human NTCP	PMID:29698664
		ZIKV	*								Human NTCP	PMID:29698664
Famciclovir	Approved antiviral	HSV-1							*		Viral DNA pol	CID:3324, DB00426
		HSV-2							*		Viral DNA pol	CID:3324, DB00426
		VZV						*	*		Viral DNA pol	CID:3324, DB00426, NCT01327144
Favipiravir	Approved antiviral	FLUAV					*		*		Viral RNA pol	CID:492405, NCT03394209
		FLUCV					*		*		Viral RNA pol	CID:492405, NCT03394209
		FLUBV					*		*		Viral RNA pol	CID:492405, NCT03394209
		ZIKV	*								Viral RNA pol	PMID:29967017
		CCHFV	*		*						Viral RNA pol	PMID:29936152
		LASV	*								Viral RNA pol	PMID:29882740
		NIV	*								Viral RNA pol	PMID:29765101
		YFV	*								Viral RNA pol	PMID:19428599
		RVFV	*								Viral RNA pol	PMID:19428599
		RABV	*								Viral RNA pol	PMID:29459063
		MARV	*		*						Viral RNA pol	PMID:29369776
		CHIKV	*		*						Viral RNA pol	PMID:28958920
		SNV	*								Viral RNA pol	PMID:23856782
		LCMV	*								Viral RNA pol	PMID:31302150
		ANDV	*								Viral RNA pol	PMID:23856782
		EBOV					*				Viral RNA pol	NCT02329054
Filociclovir	Investigational antiviral	CMV				*					Viral DNA pol	NCT01433835
		ADV	*								Viral DNA pol	PMID:30287226
		HHV-6	*								Viral DNA pol	PMID:30287227
		EBV	*								Viral DNA pol	PMID:30287227
		KSHV	*								Viral DNA pol	PMID:30287227
Flavopiridol	Approved anticancer	HSV-1	*								Human CDKs	PMID:24205359
		ADV	*								Human CDKs	PMID:28434229
		FLUAV	*		*						Human CDKs	PMID:27486199
Fluoxetine	Approved antidepressant	HEV-B	*								Viral helicase	PMID:23335743	PMID: 24798281	PMID: 29556778
		HEV-C	*								Viral helicase	PMID:23335743
		DENV	*								Viral helicase	PMID:27572397
		HCV	*								Viral helicase	PMID:25151487
Fluvastatin	Approved lipid-lowering	HCV				N.A.					Human HMGCR	NCT00441493	PMID: 18086693	PMID:18983427/PMID: 30590315
		DENV	*								Human HMGCR	PMID:27431377
		FLUAV	*								Human HMGCR	PMID:24676773
Formoterol	Approved antiasthmatic	HEV-A	*								Viral helicase	PMID:26856848	PMID: 20470412
		HEV-B	*								Viral helicase	PMID:26856848
		HEV-C	*								Viral helicase	PMID:26856848
		HEV-D	*								Viral helicase	PMID:26856848
Foscarnet	Approved antiviral	CMV					*	*	*	*	Viral DNA pol	CID:3415, DB00529, NCT00947141	PMID: 28993329
		HSV-1					*		*		Viral DNA pol	CID:3415, DB00529, NCT03073967
		HSV-2							*		Viral DNA pol	CID:3415, DB00529
		VZV	*							*	Viral DNA pol	PMID:30677427, NCT02151240
		EBV	*								Viral DNA pol	PMID:30677427
		HHV-6	*								Viral DNA pol	PMID:30677427
		KSHV	*								Viral DNA pol	PMID:30677427
Ganciclovir	Approved antiviral	CMV				*	*	*	*	*	Viral DNA pol	CID:135398740, DB01004, NCT02943057
		HSV-1	*								Viral DNA pol	PMID:30287226
		HSV-2	*								Viral DNA pol	PMID:30287226
		VZV	*				*				Viral DNA pol	PMID:30677427, NCT02382588
		ADV	*				*	*		*	Viral DNA pol	PMID:30677427, NCT01533480
		VACV	*								Viral DNA pol	PMID:30677427
		EBV	*								Viral DNA pol	PMID:30677427
Gefitinib	Approved antivcancer	BKV	*								Human RTKs	PMID:21088155			PMID: 25246725
		HCV	*								Human RTKs	doi: 10.3389/fimmu.2019.02186
		CMV	*		*						Human RTKs	PMID:18329738
		VACV	*								Human RTKs	PMID:21094187
Gemcitabine	Approved anticancer	HEV-B	*								Human RRM1	PMID:26526589	PMID: 31191461
		HEV-A	*								Human RRM1	PMID:26526589
		HIV-1	*								Human RRM1	PMID:24120088
		HRV-A	*								Human RRM1	PMID:28705625
		HSV-1	*								Human RRM1	PMID:22910914
		FLUAV	*								Human RRM1	PMID:22910914
		SINV	*								Human RRM1	PMID:22910914
		HEV-C	*								Human RRM1	PMID:27733043
		VACV	*								Human RRM1	PMID:28607950
		HCV	*								Human RRM1	PMID:22347373
		SARS-CoV	*								Human RRM1	PMID:24841273
		MERS-CoV	*								Human RRM1	PMID:24841273
		ZIKV	*								Human RRM1	PMID:28049006
Glycyrrhizin	Approved anti-inflammatory	SARS-CoV	*								Human TNF	PMID:15715493	PMID: 27820854
		HPIV-2	*								Human TNF	PMID:29070744
		FLUAV	*								Human TNF	PMID:25801933
		HSV-1	*								Human TNF	PMID:24173639
		HCV	*								Human TNF	PMID:23874843
		HEV-B	*								Human TNF	PMID:23454684
		HEV-A	*								Human TNF	PMID:23454684
		RV	*								Human TNF	PMID:22616823
		KSHV	*								Human TNF	PMID:21880767
		HIV-1	*								Human TNF	PMID:19529000
		EBV	*								Human TNF	PMID:18423902
Homoharringtonine	Approved anticancer	HBV	*								Human ribosome	PMID:17458779			PMID: 27912879
		MERS-CoV	*								Human ribosome	PMID:25451075
		HEV-B	*								Human ribosome	doi: 10.20944/preprints201909.0128.v1
		VZV	*								Human ribosome	PMID:30456755
		HSV-1	*								Human ribosome	PMID:30388805
Hydroxychloroquine	Approved antimalarial	DENV	*								Unknown	PMID:25321315			DB01611
		HIV-1	*			*	*				Unknown	PMID:8565026, NCT01067417
		ZIKV	*		*						Unknown	PMID:28694387
		CHIKV	*								Unknown	PMID:27699657
Imatinib	Approved anticancer	BKV	*								Human RTKs	PMID:21088155	PMID: 29298032			NCT02644525 / PMID: 29166233
		HCV	*								Human RTKs	PMID:28674529
		MERS-CoV	*								Human RTKs	PMID:27466418
		SARS-CoV	*								Human RTKs	PMID:27466418
Indomethacin	Approved anti-inflammatory	HIV-1	*								Human PTGS1	PMID:7875307	PMID: 16911681		PMID: 28645659
		HSV-1	*								Human PTGS1	PMID:1964373
		SARS-CoV	*								Human PTGS1	PMID:17302372
		VSV	*								Human PTGS1	PMID:25856684
Itraconazole	Approved antifungal	HEV-B	*								Multiple	PMID:25640182		DB01167
		HRV-B	*								Multiple	PMID:25640182
		HRV-A	*		*						Multiple	PMID:26976677
		Par-A3	*								Multiple	PMID:29155163
		HMPV	*								Multiple	doi: 10.3389/fimmu.2019.02186
		FLUAV	*		*						Multiple	PMID:30866762
		SAFV	*								Multiple	PMID:25640182
Isolanid (lanatoside C)	Approved antiarrhythmic	DENV	*								Unknown	PMID:25251726
		KUNV	*								Unknown	PMID:25251726
		CHIKV	*								Unknown	PMID:25251726
		SINV	*								Unknown	PMID:25251726
		HEV-B	*								Unknown	PMID:25251726
Ivermectin	Approved antihelmintic	DENV					*	*			Human importins	NCT03432442, NCT02045069	PMID: 29468054			DB00602
		CHIKV	*								Human importins	PMID:26752081
		HIV-1	*								Human importins	PMID:22417684
		SINV	*								Human importins	PMID:26752081
		YFV	*								Human importins	PMID:26752081
		HENV	*								Human importins	PMID:29321677
		ZIKV	*								Human importins	PMID:27476412
Lamivudine	Approved antiviral	HBV							*		Viral RT	CID:60825, DB00709
		HIV-1							*		Viral RT	CID:60825, DB00709
		HIV-2							*		Viral RT	CID:60825, DB00709
Leflunomide	Approved immunosuppressant	BKV	*								Human DHODH	PMID:22461534
		CMV	*								Human DHODH	PMID:26652481
		JUNV	*								Human DHODH	PMID:29315647
		HSV-1	*								Human DHODH	PMID:11211189
		RV	*	*							Human DHODH	PMID:30974126
		EBV	*		*						Human DHODH	PMID:28574826
Letermovir	Approved antiviral	CMV					*	*	*		Viral terminase	CID:45138674, DB12070, NCT02137772
		HSV-1	*								Viral terminase	PMID:30677427
		HSV-2	*								Viral terminase	PMID:30677427
		VZV	*								Viral terminase	PMID:30677427
		EBV	*								Viral terminase	PMID:30677427
		HHV-6	*								Viral terminase	PMID:30677427
		ADV	*								Viral terminase	PMID:30677427
Lobucavir	Investigational antiviral	CMV				N.A.					Viral DNA pol	NCT00002352
		HIV-1				N.A:					Viral DNA pol	NCT00002352
		HBV	*								Viral DNA pol	PMID:10760047
		HSV-1	*								Viral DNA pol	PMID:1656194
Lopinavir	Approved antiviral	HIV-1				*	*	*	*	*	Viral protease	CID:92727, DB01601, NCT01772940
		HIV-2					*	*	*		Viral protease	CID:92727, DB01601, NCT02150993
		MERS-CoV					*	*			Viral protease	NCT02845843
		ZIKV	*		*						Viral protease	PMID:28712942
		HMPV	*								Unknown	doi: 10.3389/fimmu.2019.02186
Lovastatin	Approved lipid-lowering	DENV	*		*						Human HMGCR	PMID:24586275
		EBOV	*								Human HMGCR	PMID:29717011
		HPIV-1	*								Human HMGCR	PMID:27915128
		RSV	*		*						Human HMGCR	PMID:11257039
Luteolin	Approved anticancer	FLUAV	*								Unknown	PMID:30758716	PMID: 21090258
		DENV	*								Unknown	PMID:29665375
		HBV	*								Unknown	PMID:29270164
		EBV	*								Unknown	PMID:27185626
		JEV	*								Unknown	PMID:27126774
		HEV-A	*								Unknown	PMID:26870944
		CHIKV	*								Unknown	PMID:26003593
		HEV-B	*								Unknown	PMID:25036464
		HIV-1	*								Unknown	PMID:22140483
		SARS-CoV	*								Unknown	PMID:15452254
		TBEV	*								Unknown	PMID:29537738
Maribavir	Investigational antiviral	CMV					*				Viral DNA pol	NCT02931539
		HHV-6	*								Viral DNA pol	PMID:30677427
		EBV	*								Viral DNA pol	PMID:30677427
Memantine	Approved anti-alzheimer's disease	FLUAV	*								FLUAV M2	PMID:9588841	PMID: 25993608
		HCoV-OC43	*		*						Human GRIN3A	PMID:24227863
		HIV-1	*				*				Human GRIN3A	PMID:1707644, NCT00000867
		ZIKV	*		*						Human GRIN3A	PMID:28442607
Metformin	Approved anti-T2D	HEV-B	*								Human AMPK	PMID:24403577	PMID: 29298032
		DENV	*								Human AMPK	PMID:28384260
		HBV	*								Human AMPK	PMID:24164660
		KSHV	*								Human AMPK	PMID:27147746
		FLUAV	*		*						Human AMPK	PMID:23831494
Minocycline	Approved antibacterial	DENV	*		*						Human PADI4	PMID:29752950	DB01017	PMID: 28367877		PMID: 30587225
		HIV-1	*		*						Human PADI4	PMID:24409837
		RVFV	*								Human PADI4	PMID:29698664
		HCV	*								Human PADI4	doi: 10.3389/fimmu.2019.02186
		WNV	*		*						Human PADI4	PMID:28878079
Mycophenolic acid	Approved immunosuppressant	BKV								*	Human IMPDH	NCT01624948	PMID: 21010114
		HCV	*								Human IMPDH	PMID:30211024
		RSV	*								Human IMPDH	PMID:28775087
		CHIKV	*								Human IMPDH	PMID:21070810
		DENV	*								Human IMPDH	PMID:12504563
		RRV	*								Human IMPDH	PMID:29698664
		NoV	*								Human IMPDH	PMID:28807916
		HCoV-OC43	*								Human IMPDH	PMID:30918074
		JUNV	*								Human IMPDH	PMID:31302150
		LASV	*								Human IMPDH	PMID:31302150
		LCMV	*								Human IMPDH	PMID:31302150
		RV	*	*							Human IMPDH	PMID:27468950
		ZIKV	*								Human IMPDH	PMID:27476412
Nafamostat	Approved anticoagulant	EBOV	*								Human TMPRSS2	PMID:26346967	PMID: 22716645
		FLUAV	*								Human TMPRSS2	PMID:1510439
		FLUBV	*								Human TMPRSS2	PMID:1510439
		MERS-CoV	*								Human TMPRSS2	PMID:27550352
Nelfinavir	Approved antiviral	HIV-1					*	*	*	*	Viral protease	CID:64143, DB00220, NCT00246610			PMID: 27838277
		HSV-1	*								Viral protease	PMID:24574416
		HCV	*								Viral protease	PMID:19302339
		CHIKV	*								Viral protease	https://doi.org/10.1039/C5RA14469H
		DENV	*								Viral protease	https://doi.org/10.1039/C5RA14469H
Niclosamide	Approved antihelmintic	LASV	*								Multiple	PMID:30700611	PMID: 29487357			DB06803
		EBOV	*								Multiple	PMID:30700611
		DENV	*		*						Multiple	PMID:30125275
		ZIKV	*								Multiple	PMID:29378701
		EBV	*								Multiple	PMID:27939840
		CHIKV	*								Multiple	PMID:27742486
		JEV	*								Multiple	PMID:24348901
		SARS-CoV	*								Multiple	PMID:15215127
		VSV	*								Multiple	PMID:30791609
		RABV	*								Multiple	PMID:30791609
		HSV-1	*								Multiple	PMID:30791609
		VACV	*								Multiple	PMID:30791609
		HSV-2	*								Multiple	doi: 10.20944/preprints201909.0128.v1
		ZIKV	*	*							Multiple	PMID:27571349
		SINV	*								Multiple	PMID:30791609
Nitazoxanide	Approved antiprotozoal	FLUAV					*	*			Multiple	NCT03336619, NCT02612922	PMID: 29298032		DB00507	DB00507
		ADV					*	*			Multiple	NCT00302640
		RV					*	*			Multiple	NCT00302640
		HRV-A						*			Multiple	NCT03605862
		HCV					*	*		*	Multiple	NCT01770483
		CHIKV	*								Multiple	PMID:27742486
		RSV	*								Multiple	PMID:29992955
		HBV	*				*				Multiple	PMID:21553812, NCT03905655
		HIV-1	*				*				Multiple	PMID:25303025, NCT01529073
		VACV	*								Multiple	PMID:29625403
		RV	*								Multiple	PMID:23926336
		JEV	*		*						Multiple	PMID:24456815
		MERS-CoV	*		*						Multiple	PMID:27095301
		NoV		*			*	*			Multiple	NCT03395405, NCT00302640, PMID:30104275
		RuV	*								Multiple	PMID:28974385
		HMPV	*								Multiple	doi: 10.3389/fimmu.2019.02186
		MeV	*								Multiple	PMID:29992955
		ZIKV	*		*						Multiple	PMID:28685770
N-MCT	Investigational antiviral	HSV-2				*					Viral DNA pol	NCT02778386
		HSV-1	*								Viral DNA pol	PMID:30287226
		VZV	*								Viral DNA pol	PMID:30287226
		EBV	*								Viral DNA pol	PMID:30287227
		KSHV	*								Viral DNA pol	PMID:30287227
Omeprazole	Approved anti-gastroesophageal reflux disease	EBOV	*								Human ATP4A	PMID:26069727	PMID: 8851582		PMID: 25223993	PMID: 26402251
		FLUAV	*								Human ATP4A	PMID:26069727
		MARV	*								Human ATP4A	PMID:26069727
Oritavancin	Approved antibacterial	EBOV	*								Human CTSL	PMID:26953343	PMID: 29491695
		MERS-CoV	*								Human CTSL	PMID:26953343
		HCV	*								Human CTSL	doi: 10.3389/fimmu.2019.02186
		RVFV	*								Human CTSL	PMID:29698664
		HMPV	*								Human CTSL	doi: 10.3389/fimmu.2019.02186
		SARS-CoV	*								Human CTSL	PMID:26953343
Pentosan polysulfate	Approved anti-interstitial cystitis	HEV-A	*								Human FGF2	PMID:22771616
		HEV-B	*								Human FGF2	PMID:12941917
		RRV	*		*						Human FGF2	PMID:29437628
		HHV-7	*								Human FGF2	PMID:10480261
		HIV-1	*								Human FGF2	PMID:7683745
		FLUAV	*								Human FGF2	PMID:22197247
Pirlindole	Approved antidepressant	HEV-A	*								Viral helicase	PMID:26856848
		HEV-B	*								Viral helicase	PMID:26856848
		HCV	*								Viral helicase	doi: 10.3389/fimmu.2019.02186
		HEV-D	*								Viral helicase	PMID:26856848
Posaconazole	Approved antifungal	EBOV	*								Human OSBP	PMID:27890675		DB01263
		DENV	*								Human OSBP	PMID:29981375
		Par-A3	*								Human OSBP	PMID:29155163
		ZIKV	*								Human OSBP	PMID:29981375
Rapamycin (Sirolimus)	Approved immunosuppressant	CMV								*	Human MTOR	NCT02683291		PMID: 27613310
		BKV								*	Human MTOR	NCT01624948
		HCV					*			*	Human MTOR	NCT01469884
		FLUAV								*	Human MTOR	NCT03901001
		KSHV					*				Human MTOR	NCT01412515
		HIV-1								*	Human MTOR	NCT02990312
		RVFV	*		*						Human MTOR	PMID:28442428
		HBV	*								Human MTOR	PMID:29730285
		HDV	*								Human MTOR	PMID:29730285
		RV	*	*							Human MTOR	PMID:28475412
		HEV-B	*		*						Human MTOR	PMID:26621875
Remdesivir	Investigational antiviral	EBOV						*			Viral RNA pol	NCT03719586
		MARV	*								Viral RNA pol	PMID:28262699
		RSV	*								Viral RNA pol	PMID:28262699
		LASV	*								Viral RNA pol	PMID:28262699
		MERS-CoV	*		*						Viral RNA pol	PMID:28659436
		SARS-CoV	*		*						Viral RNA pol	PMID:29511076
		JUNV	*								Viral RNA pol	PMID:28262699
		NIV	*								Viral RNA pol	PMID:29425244
		HMPV	*								Viral RNA pol	PMID:28262699
		HEV	*								Viral RNA pol	PMID:28262699
		HCV	*								Viral RNA pol	PMID:28262699
		DENV	*								Viral RNA pol	PMID:28262699
		HCoV-OC43	*								Viral RNA pol	PMID:31233808
		HCoV-229E	*								Viral RNA pol	PMID:31233808
		TBEV	*								Viral RNA pol	PMID:28262699
Ribavirin	Approved antiviral	HCV							*	*	Viral RNA pol	CID:37542, DB00811, NCT03069001	PMID: 27991578	PMID: 31307986
		HEV					*		*		Viral RNA pol	CID:37542, NCT01698723
		RSV	*				*	*	*		Viral RNA pol	CID:37542, DB00811, NCT00016081
		CHIKV	*								Viral RNA pol	PMID:30354193
		MeV	*								Viral RNA pol	PMID:30030950
		RABV	*								Viral RNA pol	PMID: 29459063
		LCMV	*								Viral RNA pol	PMID:31302150
		RV	*	*							Viral RNA pol	PMID:26408355
		LASV	*		*		*				Viral RNA pol	PMID:28916737, NCT00992693
Ritonavir	Approved antiviral	HIV-1					*	*	*	*	Viral protease	CID:392622, DB00503, NCT01702090
		HIV-2					*	*	*		Viral protease	CID:392622, NCT02150993
		RVFV	*								Unknown	PMID:29698664
		MERS-CoV	*				*	*			Viral protease	PMID:26198719, NCT02150993
Roscovitine (Seliciclib)	Investigational anti-Cushing disease	HIV-1	*								Human CDKs	PMID:17625008
		HSV-1	*								Human CDKs	PMID:11773384
		VZV	*		*						Human CDKs	PMID:20307580
		EBV	*								Human CDKs	PMID:21209116
		JCV	*								Human CDKs	PMID:17919676
Silvestrol	Investigational anticancer	CHIKV	*								Human EIF4A	PMID:30380742
		MERS-CoV	*								Human EIF4A	PMID:29258862
		EBOV	*								Human EIF4A	PMID:27864075
		ZIKV	*								Human EIF4A	PMID:29584632
		HEV	*		*						Human EIF4A	PMID:30036559
		FLUAV	*								Human EIF4A	PMID:29258238
		HEV-C	*								Human EIF4A	PMID:29258862
		HRV-A	*								Human EIF4A	PMID:29258862
		HCoV-229E	*								Human EIF4A	PMID:29258862
Simvastatin	Approved lipid-lowering	HCV					*				Human HMGCR	NCT03490097	PMID: 18086693	PMID: 26119850	PMID: 26119850
		CMV	*								Human HMGCR	PMID:24976258
		DENV	*								Human HMGCR	PMID:27431377
		HBV	*			*					Human HMGCR	PMID:27779671, NCT00994773
		FLUAV	*								Human HMGCR	PMID:25882623
		HEV-C	*								Human HMGCR	PMID:16824485
Sofosbuvir	Approved antiviral	HCV					*	*	*	*	Viral RNA pol	CID:45375808, DB08934, NCT03069001
		ZIKV	*	*	*						Viral RNA pol	PMID:27902933
		DENV	*								Viral RNA pol	PMID:28834304
		CHIKV	*		*						Viral RNA pol	PMID:30455237
Sunitinib	Approved anticancer	BKV	*								Human RTKs	PMID:21088155
		DENV	*		*						Human RTKs	PMID:28240606
		EBOV	*		*	*	*				Human RTKs	PMID:28240606, NCT02380625
		ZIKV	*								Human RTKs	PMID:28240606
		CHIKV	*								Human RTKs	PMID:28240606
		JUNV	*								Human RTKs	PMID:28240606
		HIV-1	*								Human RTKs	PMID:28240606
		RSV	*								Human RTKs	PMID:28240606
		HCV	*								Human RTKs	PMID:28240606
Suramin	Approved antiprotozoal	ZIKV	*								Viral protease	PMID:30393012	PMID: 24722837	PMID: 18983427	DB04786
		EBOV	*								Multiple	PMID:27581733
		CHIKV	*								Multiple	PMID:27581733
		HEV-A	*								Multiple	PMID:28218309
		DENV	*								Multiple	PMID:25281902
		RVFV	*								Multiple	PMID:25267680
		HDV	*								Multiple	PMID:21187936
		HCV	*								Multiple	PMID:10022794
		HIV-1	*								Multiple	PMID:31346035
		NOV	*								Multiple	PMID:24622391
Teicoplanin	Approved antibacterial	EBOV	*								Human CTSL	PMID:26953343	DB06149
		FLUAV	*								Human CTSL	PMID:30170320
		FLUBV	*								Human CTSL	PMID:30170320
		MERS-CoV	*								Human CTSL	PMID:26953343
		SARS-CoV	*								Human CTSL	PMID:26953343
Telavancin	Approved antibacterial	EBOV	*								Human CTSL	PMID:26953343	DB06402
		MERS-CoV	*								Human CTSL	PMID:26953343
		SARS-CoV	*								Human CTSL	PMID:26953343
Tenofovir	Approved antiviral	HBV						*	*	*	Viral RT	CID:464205, NCT02039362
		HIV-1						*	*	*	Viral RT	CID:464205, NCT03998176
		HIV-2					*	*	*	*	Viral RT	CID:464205, NCT02180438
		HSV-2						*			Viral DNA pol	NCT01386294
Thymalfasin	Approved antiviral	HBV							*	*	Unknown	CID:16130571, NCT03448744
		HCV						*	*		Unknown	CID:16130571, NCT01178996
		HIV-1				*					Unknown	NCT00001036
Topotecan	Approved anticancer	DENV	*								Human TOP1	PMID:24727241
		EBOV	*		*						Human TOP1	PMID:27127234
		HCV	*								Human TOP1	PMID:23529728
		HIV-1	*				*				Human TOP1	PMID:9145855, NCT00002395
		FLUAV	*								Human TOP1	PMID:27127234
		JCV	*								Human TOP1	PMID:26935240
Trifluridine	Approved antiviral	HSV-1				N.A.			*		Viral DNA pol	CID:6256, DB00432, NCT00000635	PMID: 23919755
		HSV-2							*		Viral DNA pol	CID:6256, DB00432, NCT00000635
		VACV							*		Viral DNA pol	CID:6256
Valacyclovir	Approved antiviral	CMV							*		Viral DNA pol	CID:135398741	PMID: 29298032
		EBV							*		Viral DNA pol	CID:135398741
		HBV							*		Viral DNA pol	CID:135398741
		HSV-1							*		Viral DNA pol	CID:135398741, DB00577
		HSV-2							*	*	Viral DNA pol	CID:135398741, DB00577; NCT01026454
		VZV							*		Viral DNA pol	CID:135398741
Verapamil	Approved antiarrhythmic	CMV	*								Human CACNA1C	PMID:2819886		PMID: 24650198
		EBOV	*		*						Human CACNA1C	PMID:25722412
		HRV-A	*								Human CACNA1C	PMID:16054245
		FLUAV	*								Human CACNA1C	PMID:6743023
Vidarabine	Approved antiviral	HSV-1							*		Viral DNA pol	CID:21704, DB00194
		HSV-2							*		Viral DNA pol	CID:21704, DB00194
		VZV							*		Viral DNA pol	CID:21704, DB00194
Kasugamycin	Approved antibacterial	HSV-2	*		*						Unknown	PMID:29632368	CID:65174
		ZIKV	*		*						Unknown	PMID:29632368
		FLUAV	*		*						Unknown	PMID:29632368
Amiodarone	Approved antiarrhythmic	EBOV	*				*	*			Human CYPs	NCT02307591
		SINV	*								Human CYPs	PMID:30791609
		RRV	*								Human CYPs	PMID:30791609
		DENV	*								Human CYPs	PMID:30791609
		YFV	*								Human CYPs	PMID:30791609
		HSV-1	*								Human CYPs	PMID:21502533
		HCV	*								Human CYPs	PMID:23659500
		VSV	*								Human CYPs	PMID:23659500
		SARS-CoV	*								Human CYPs	PMID:18314540
Mitoxantrone	Approved anticancer	SINV	*								Human TOP2	PMID:30791609		PMID: 21939347
		RRV	*								Human TOP2	PMID:30791609
		DENV	*								Human TOP2	PMID:30791609
		ZIKV	*		*						Human TOP2	PMID:30791609
		YFV	*								Human TOP2	PMID:30791609
		HSV-1	*								Human TOP2	PMID:30791609
		KSHV					*				Human TOP2	NCT00002259
		HCV	*								Human TOP2	PMID:30791609
Quinine	Approved antimalarial	DENV	*								Unknown	PMID:30055216	PMID: 19402279		DB00468
		HSV-1	*								Unknown	PMID:17600687
		FLUAV	*								Unknown	PMID:4921360
Raloxifene	Approved antiosteoporosis	SINV	*								Human ER	PMID:30791609	PMID: 30563895
		DENV	*								Human ER	PMID:30791609
		YFV	*								Human ER	PMID:30791609
		HSV-1	*								Human ER	PMID:30791609
		VSV	*								Human ER	PMID:30791609
		RABV	*								Human ER	PMID:30791609
		HIV-1	*								Human ER	PMID:30791609
		VACV	*								Human ER	PMID:30791609
		EBOV	*		*						Human ER	PMID:23785035
Apilimod	Investigational anticancer	EBOV	*								Human PIKfyve	PMID:28403145
		MARV	*								Human PIKfyve	PMID:28403145
		LASV	*								Human PIKfyve	PMID:30700611
Tamoxifen	Approved anticancer	HIV-1	*			*					Human ER	NCT03382834, NCT03382834	PMID: 30563895	PMID: 26628015		PMID: 23509701
		EBOV	*		*						Human ER	PMID:23785035
		HCV	*			*					Human ER	PMID:17704057
		HSV-1	*								Human ER	PMID:24657267, NCT00749138
Novobiocin	Approved antibacterial	ZIKV	*		*						Multiple	PMID:28712942	DB01051
		JEV	*								Multiple	PMID:2846831
		VACV	*								Multiple	PMID:9300044
		KSHV	*								Multiple	PMID:22106228
		EBV	*								Multiple	PMID:24821256
		HSV-1	*		*						Multiple	PMID:3041048
Manidipine	Approved antihypertensive	JEV	*		*						Multiple	PMID:28814523
		ZIKV	*								Multiple	PMID:28814523
		WNV	*								Multiple	PMID:28814523
		DENV	*								Multiple	PMID:28814523
		CMV	*								Multiple	PMID:29274844
Bepridil	Approved anti-anginal, withdrawn	DENV	*								Viral glycoproteins	PMID:30791609	PMID: 20031379
		MARV	*		*						Viral glycoproteins	PMID:29982632
		EBOV	*								Viral glycoproteins	PMID:29939303
Obatoclax	Investigational anticancer	FLUAV	*								Human MCL1	PMID:22910914
		ZIKV	*								Human MCL1	PMID:28049006
		WNV	*								Human MCL1	PMID:27993855
		YFV	*								Human MCL1	PMID:27993855
		RVFV	*								Human MCL1	doi: 10.20944/preprints201909.0128.v1
		HEV-B	*								Human MCL1	doi: 10.20944/preprints201909.0128.v1
		HMPV	*								Human MCL1	doi: 10.20944/preprints201909.0128.v1
		HSV-2	*								Human MCL1	doi: 10.20944/preprints201909.0128.v1
		SINV	*								Human MCL1	PMID:22910914
		JUNV	*								Human MCL1	PMID:31302150
		LASV	*								Human MCL1	PMID:31302150
		LCMV	*								Human MCL1	PMID:31302150
Camptothecin	Investigational anticancer	HEV-A	*								Human TOP1	PMID:28427827
		HIV-1	*								Human TOP1	PMID:20110878
		HSV-1	*								Human TOP1	PMID:20397103
		KSHV	*								Human TOP1	PMID:22106228
		HCV	*								Human TOP1	PMID:26045353
		FLUAV	*								Human TOP2	PMID:4475096
		EBV	*								Human TOP1	PMID:19494003
Regorafenib	Approved anticancer	FLUAV	*								Human RTKs	PMID:30883607
		SFTSV	*								Human RTKs	PMID:31027241
		HTV	*								Human RTKs	PMID:30883607
		HSV-1	*								Human RTKs	PMID:30883607
		VSV	*								Human RTKs	PMID:30883607
Sorafenib	Approved anticancer	FLUAV	*								Human RTKs	PMID:30883607	PMID: 31214565
		HTV	*								Human RTKs	PMID:30883607
		HSV-1	*								Human RTKs	PMID:30883607
		SINV	*								Human RTKs	PMID:29981794
		CHIKV	*								Human RTKs	PMID:29981794
		RABV	*								Human RTKs	PMID:29459063
		HCV	*								Human RTKs	PMID:23281732
		HEV-A	*								Human RTKs	PMID:24680956
		KHSV				*					Human RTKs	NCT00287495
		VSV	*								Human RTKs	PMID:30883607
Monensin	Approved antibacterial	RSV	*								Unknown	PMID: 30095982	DB11430
		CMV	*								Unknown	PMID: 23571549
		HSV-1	*								Unknown	PMID: 20097166
Salinomycin	Approved antibacterial	CMV	*								Human ABCs	PMID:23571549	DB11544
		FLUAV	*		*						Human ABCs	PMID:30282713
		RSV	*								Human ABCs	PMID:30095982
Hexachlorophene	Approved antibacterial, withdrawn	SFTSV	*								Human SDHD	PMID:31027241	DB00756
		MERS-CoV	*								Human SDHD	PMID:25451075
		SV40	*								Human SDHD	PMID:22898086
		BKV	*								Human SDHD	PMID:22898086
Bithionol	Approved antibacterial, withdrawn	SV40	*								Unknown	PMID:22898086	DB04813
		BKV	*								Unknown	PMID:22898086
		ZIKV	*								Unknown	PMID:27686742
Pleconaril	Approved antiviral	HEV-D					*		*		Viral VP1	DB05105
		HEV-J							*		Viral VP1	DB05105
		HRV-A					*		*		Viral VP1	DB05105
		HRV-B							*		Viral VP1	DB05105
Zanamivir	Approved antiviral	FLUAV					*		*		Viral NA	DB00558
		FLUBV					*		*		Viral NA	DB00558
		Par-A3	*								Viral HN	PMID:12477836
Enoxacin	Approved antibacterial	ZIKV		*							Human RNAi	PMID:30814679	DB00467
		HCV	*								Human RNAi	PMID:20527935
		HIV-1	*								Human RNAi	PMID:9876209
Genistin	Investigational antidepressant	HIV-1	*								Multiple	PMID:24963618
		HBV		*							Multiple	PMID:27746336
		FLUAV	*		*						Multiple	https://doi.org/10.1016/j.jef.2015.04.001
		RVFV	*								Multiple	PMID:17709444
		HSV-1	*								Multiple	PMID:8397505

## Sheet: Sheet2
Virus	Abbreviation	Family	Group	Viral disease
Adenovirus	ADV	Adenoviridae	dsDNA	Acute respiratory disease
Andes virus	ANDV	Hantaviridae	(-)ssRNA	Hantavirus cardiopulmonary syndrome
BK virus	BKV	Polyomaviridae	dsDNA	Nephropathy and hemorrhagic cystitis
Bunyamwera virus	BUNV	Peribunyaviridae	(-)ssRNA	Bunyamwera fever
Chikungunya virus	CHIKV	Togaviridae	(+)ssRNA	Chikungunya fever
Coxsackievirus A	CAV9 (HEV-B)	Picornaviridae	(+)ssRNA	Viral myocarditis, infection of CNS and respiratory tract
Coxsackievirus B3	CVB3 (HEV-B)	Picornaviridae	(+)ssRNA	Viral myocarditis
Coxsackievirus B4	CVB4 (HEV-B)	Picornaviridae	(+)ssRNA	Herpangina, tonsillitis, and pharyngitis
Crimean–Congo hemorrhagic fever virus	CCHFV	Nairoviridae	(-)ssRNA	Crimean–Congo hemorrhagic fever
Cytomegalovirus	CMV	Herpesviridae	dsDNA	Mononucleosis-like illness*
Dengue virus	DENV	Flaviviridae	(+)ssRNA	Dengue fever
Ebola virus	EBOV	Filoviridae	(-)ssRNA	Ebola hemorrhagic fever
Echovirus 1	EV1 (HEV-B)	Picornaviridae	(+)ssRNA	Febrile illness and aseptic meningitis
Echovirus 6	EV6 (HEV-B)	Picornaviridae	(+)ssRNA	Neurological symptoms, aseptic meningitis
Enterovirus 68	EV68 (HEV-D)	Picornaviridae	(+)ssRNA	Acute flaccid myelitis.
Enterovirus 70	EV70 (HEV-D)	Picornaviridae	(+)ssRNA	Acute hemorrhagic conjunctivitis
Enterovirus 71	EV71 (HEV-A)	Picornaviridae	(+)ssRNA	Hand, foot, and mouth disease
Epstein-Barr virus	EBV	Herpesviridae	dsDNA	Infectious mononucleosis
Hantavirus	HTV	Hantaviridae	(-)ssRNA	Hantavirus cardiopulmonary syndrome
Hendra virus	HenV	Paramyxoviridae	(-)ssRNA	Severe encephalitis and respiratory disease
Hepatitis B virus	HBV	Hepadnaviridae	dsDNA-RT	Hepatitis B
Hepatitis C virus	HCV	Flaviviridae	(+)ssRNA	Hepatitis C
Hepatitis D virus	HDV	Unassigned	(-)ssRNA	Hepatitis D
Hepatitis E virus	HEV	Hepeviridae	(+)ssRNA	Hepatitis E
Herpes simplex virus 1	HSV-1	Herpesviridae	dsDNA	Cold sores
Herpes simplex virus 2	HSV-2	Herpesviridae	dsDNA	Genital herpes
Human coronavirus OC43	HCoV-OC43	Coronaviridae	(+)ssRNA	Common cold
Human coronavirus strain 229E	HCoV-229E	Coronaviridae	(+)ssRNA	Common cold
Human herpesvirus 6	HHV-6	Herpesviridae	dsDNA	Exanthema subitum
Human herpesvirus 7	HHV-7	Herpesviridae	dsDNA	Exanthema subitum
Human immunodeficiency virus 1	HIV-1	Retroviridae	ssRNA-RT	Acquired immune deficiency syndrome
Human immunodeficiency virus 2	HIV-2	Retroviridae	ssRNA-RT	Acquired immune deficiency syndrome
Human metapneumovirus	HMPV	Pneumoviridae	(-)ssRNA	Lower respiratory infection in young children
Human papillomavirus	HPV	Papillomaviridae	dsDNA	Genital warts and laryngeal papillomatosis
Human parainfluenza virus 1	HPIV-1	Paramyxoviridae	(-)ssRNA	Upper respiratory tract infections
Human parainfluenza virus 2	HPIV-2	Paramyxoviridae	(-)ssRNA	Upper respiratory tract infections
Human rhinovirus 14	HRV14 (HRV-B)	Picornaviridae	(+)ssRNA	Cold-like illnesses
Human rhinovirus 1B	HRV1B (HRV-A)	Picornaviridae	(+)ssRNA	Cold-like illnesses
Human rhinovirus 89	HRV89 (HRV-A)	Picornaviridae	(+)ssRNA	Cold-like illnesses
Human rhinovirus A16	HRV16 (HRV-A)	Picornaviridae	(+)ssRNA	Cold-like illnesses
Human rhinovirus A2	HRV2 (HRV-A)	Picornaviridae	(+)ssRNA	Cold-like illnesses
Influenza A virus	FLUAV	Orthomyxoviridae	(-)ssRNA	Influenza
Influenza B virus	FLUBV	Orthomyxoviridae	(-)ssRNA	Influenza
Influenza C virus	FLUCV	Orthomyxoviridae	(-)ssRNA	Influenza
Japanese encephalitis virus	JEV	Flaviviridae	(+)ssRNA	Japanese encephalitis
John Cunningham virus	JCV	Polyomaviridae	dsDNA	Progressive multifocal leukoencephalopathy
Junin virus	JUNV	Arenaviridae	(-)ssRNA	Argentine hemorrhagic fever
Kaposi's sarcoma-associated herpesvirus	KSHV	Herpesviridae	dsDNA	Kaposi's sarcoma
Kunjin virus	KUNV	Flaviviridae	(+)ssRNA	Kunjin virus disease
Lassa virus	LASV	Arenaviridae	(-)ssRNA	Lassa hemorrhagic fever
Marburg virus	MARV	Filoviridae	(-)ssRNA	Marburg hemorrhagic fever
Measles virus	MeV	Paramyxoviridae	(-)ssRNA	Measles
Middle East respiratory syndrome coronavirus	MERS-CoV	Coronaviridae	(+)ssRNA	Middle East respiratory syndrome
Molluscum contagiosum virus	MCV	Poxviridae	dsDNA	Molluscum contagiosum
Nipah virus	NiV	Paramyxoviridae	(-)ssRNA	Severe encephalitis and respiratory disease
Norovirus	NoV	Caliciviridae	(+)ssRNA	Gastroenteritis
Parechovirus A3	Par-A3	Picornaviridae	(+)ssRNA	Infection of the central nervous system
Parvovirus B19	B19V	Parvoviridae	ssDNA	Erythema infectiosum
Poliovirus	PV (HEV-C)	Picornaviridae	(+)ssRNA	Poliomyelitis
Powassan virus	POWV	Flaviviridae	(+)ssRNA	Powassan virus disease
Rabies virus	RABV	Rhabdoviridae	(-)ssRNA	Rabies
Ravn virus	RAVV	Filoviridae	(-)ssRNA	RAVN hemorrhagic fever
Respiratory syncytial virus	RSV	Pneumoviridae	(-)ssRNA	Lower respiratory tract infections
Rift Valley fever virus	RVFV	Phenuiviridae	(-)ssRNA	Rift Valley fever
Ross River virus	RRV	Togaviridae	(+)ssRNA	Influenza-like illness and polyarthritis
Rotavirus	RV	Reoviridae	dsRNA	Gastroenteritis
Rubella virus	RuV	Togaviridae	(+)ssRNA	Rubella
Saffold virus	SAFV	Picornaviridae	(+)ssRNA	Unknown
Severe acute respiratory syndrome coronavirus	SARS-CoV	Coronaviridae	(+)ssRNA	Severe acute respiratory syndrome
Severe fever with thrombocytopenia syndrome virus	SFTSV	Phenuiviridae	(-)ssRNA	Severe fever with thrombocytopenia syndrome
Simian vacuolating virus 40	SV40	Polyomaviridae	dsDNA	Causes tumors
Sin Nombre virus	SNV	Hantaviridae	(-)ssRNA	Hantavirus cardiopulmonary syndrome
Sindbis virus	SINV	Togaviridae	(+)ssRNA	Rash and arthritis
Tick-borne encephalitis virus	TBEV	Flaviviridae	(+)ssRNA	Tick-borne encephalitis
Vaccinia virus	VACV	Poxviridae	dsDNA	No disease in human
Varicella zoster virus	VZV	Herpesviridae	dsDNA	Chickenpox (varicella)
Variola virus	VARV	Poxviridae	dsDNA	Smallpox
Vesicular stomatitis virus	VSV	Rhabdoviridae	(-)ssRNA	Vesicular stomatitis
West Nile virus	WNV	Flaviviridae	(+)ssRNA	West Nile fever
Yellow fever virus	YFV	Flaviviridae	(+)ssRNA	Yellow fever
Zika virus	ZIKV	Flaviviridae	(+)ssRNA	Zika virus disease
Mammarenavirus lymphocytic choriomeningitis virus	LCMV	Arenaviridae	(-)ssRNA	Lymphocytic choriomeningitis
‎Coxsackievirus A16	FMDV (HEV-A)	Picornaviridae	(+)ssRNA	Hand, foot, and mouth disease
